# Supplementary material for: Unveiling the pathophysiology of restless legs syndrome through transcriptome analysis
Source: PubMed Central journal article supplement — iScience. 2024 Mar 26;27(4):109568. doi: 10.1016/j.isci.2024.109568 (PMC11015462; doi:10.1016/j.isci.2024.109568), 2024-03-26
Supplement: mmc1.pdf [file mmc1.pdf]

**iScience, Volume 27**

**Supplemental information**

**Unveiling the pathophysiology  
of restless legs syndrome through  
transcriptome analysis**

**Maria P. Mogavero, Michele Salemi, Giuseppe Lanza, Antonio Rinaldi, Giovanna Marchese, Maria Ravo, Maria Grazia Salluzzo, Amedeo Antoci, Lourdes M. DelRosso, Oliviero Bruni, Luigi Ferini-Strambi, and Raffaele Ferri**

Supplemental Figure S1 (related to Methods). Statistical power calculation based on our data.

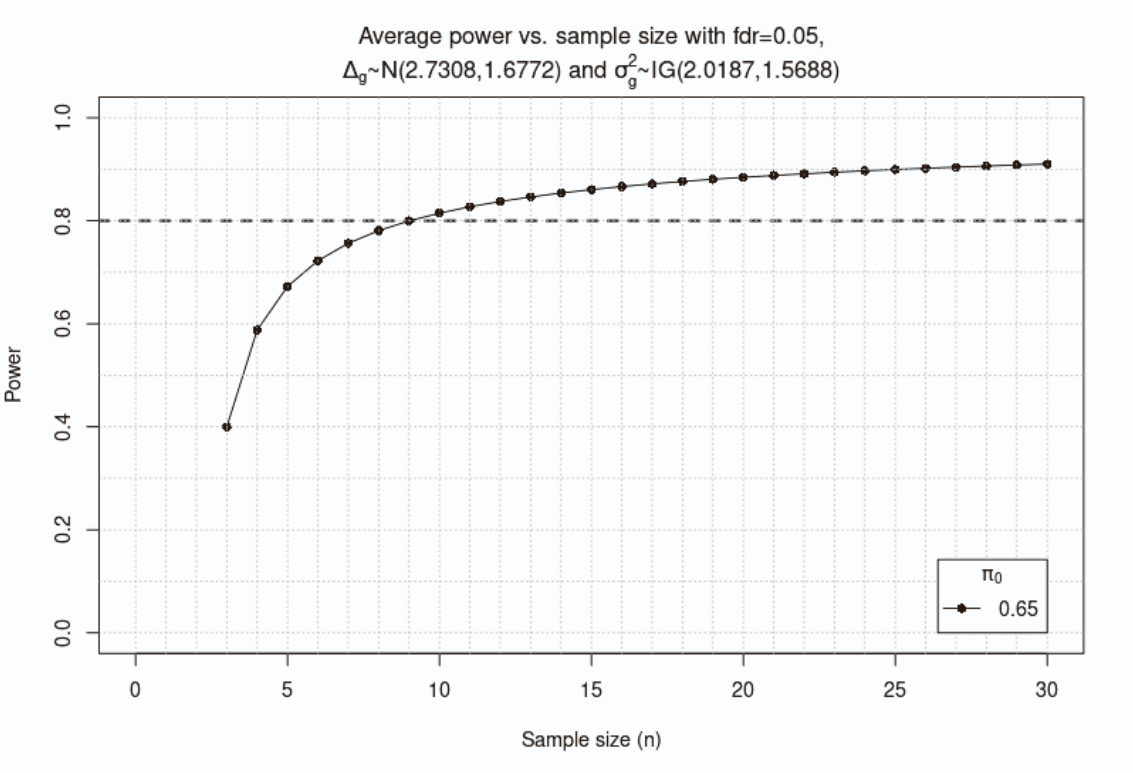

**Supplemental Figure S2 (related to Table1).**

Statistically significant pathways found by pathfinder involved in infections. Panel A: The heatmap shows the average of aggregated term scores per sample for patients with RLS and healthy controls (CTRL). Panel B: Bubble plot of selected enrichment KEGG pathways. P values were shown by different colors, the size of bubbles indicates the gene count of each pathway. Panel C: Tem-Gene Heatmap, shows the heatmap of genes that are involved in the enriched terms, as well as the common or distinct genes between different terms. The tile colors indicate the change values.

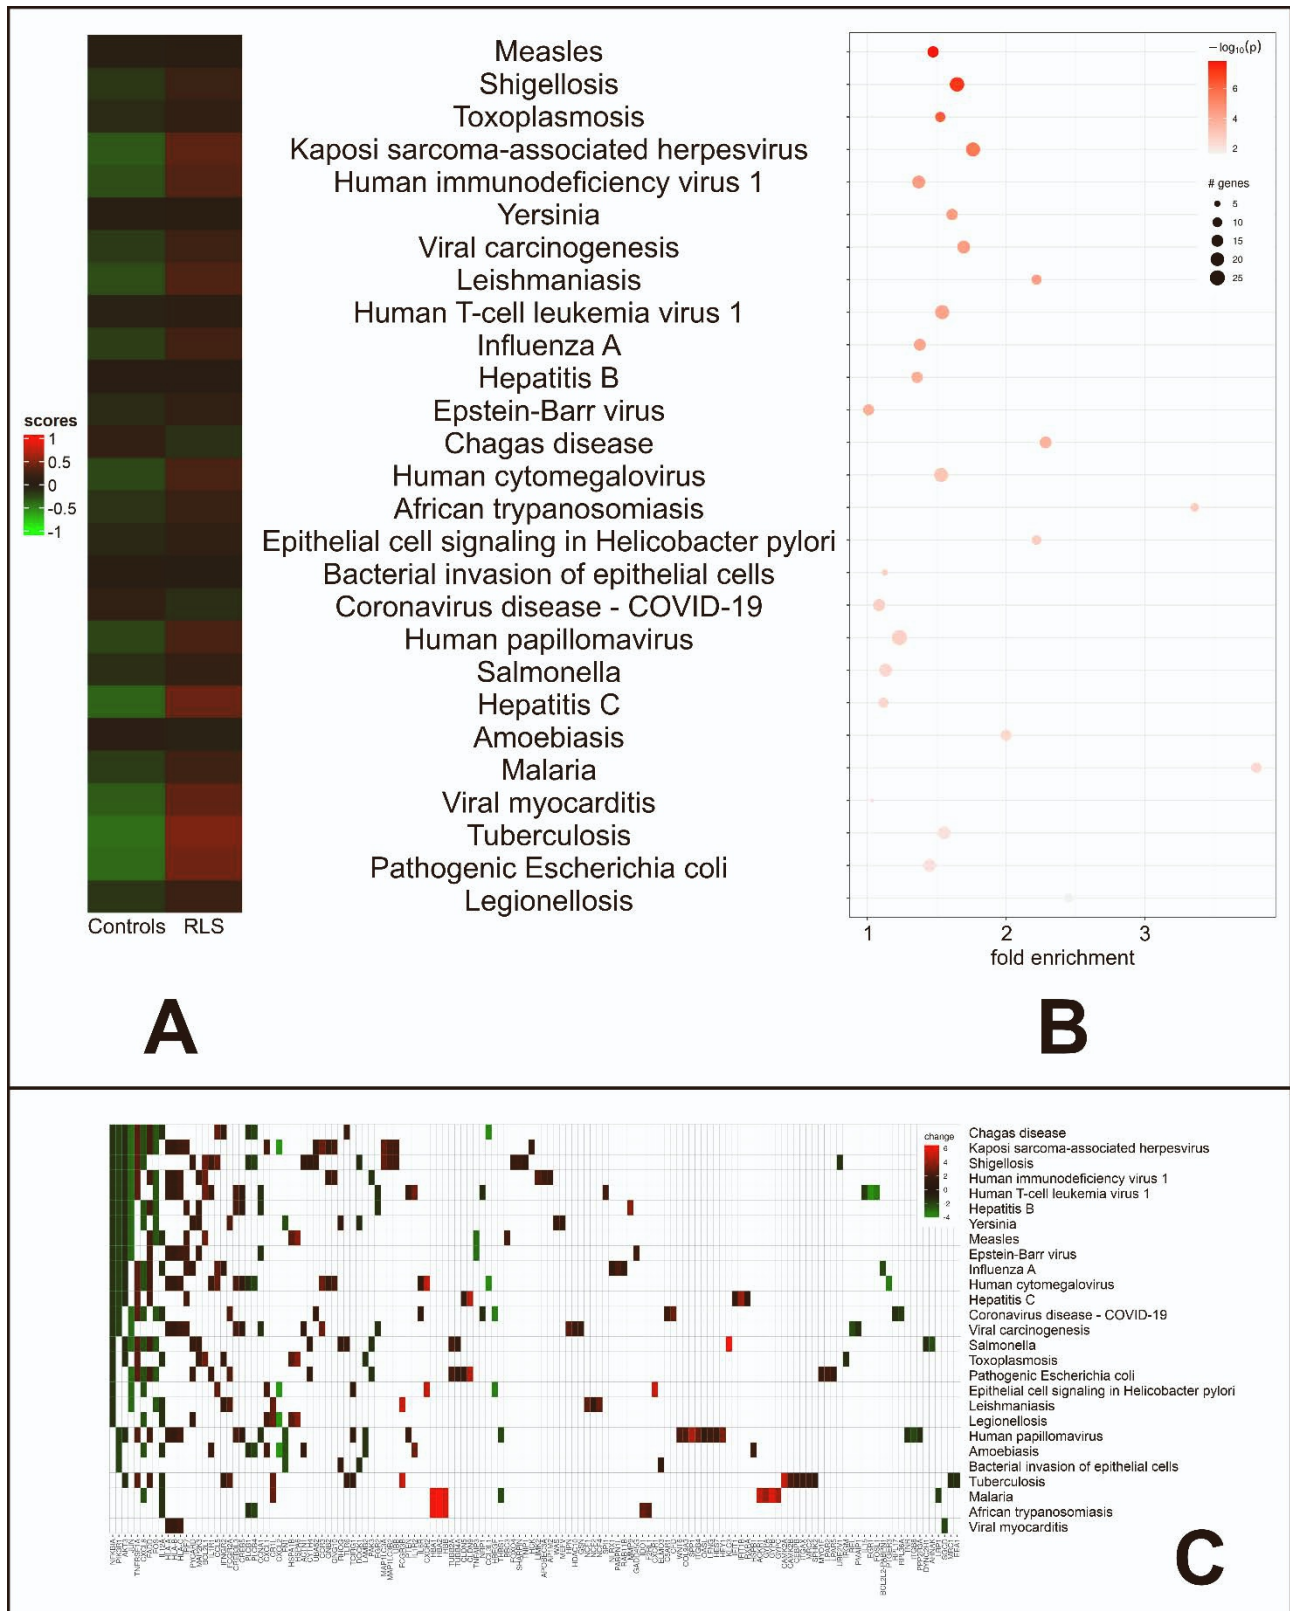

**Supplemental Figure S3 (related to Table1).**

Statistically significant pathways found by pathfinder involved in inflammation. Panel A: The heatmap shows the average of aggregated term scores per sample for patients with RLS and healthy controls (CTRL). Panel B: Bubble plot of selected enrichment KEGG pathways. P values were shown by different colors, the size of bubbles indicates the gene count of each pathway. Panel C: Term-Gene Heatmap, shows the heatmap of genes that are involved in the enriched terms, as well as the common or distinct genes between different terms. The tile colors indicate the change values.

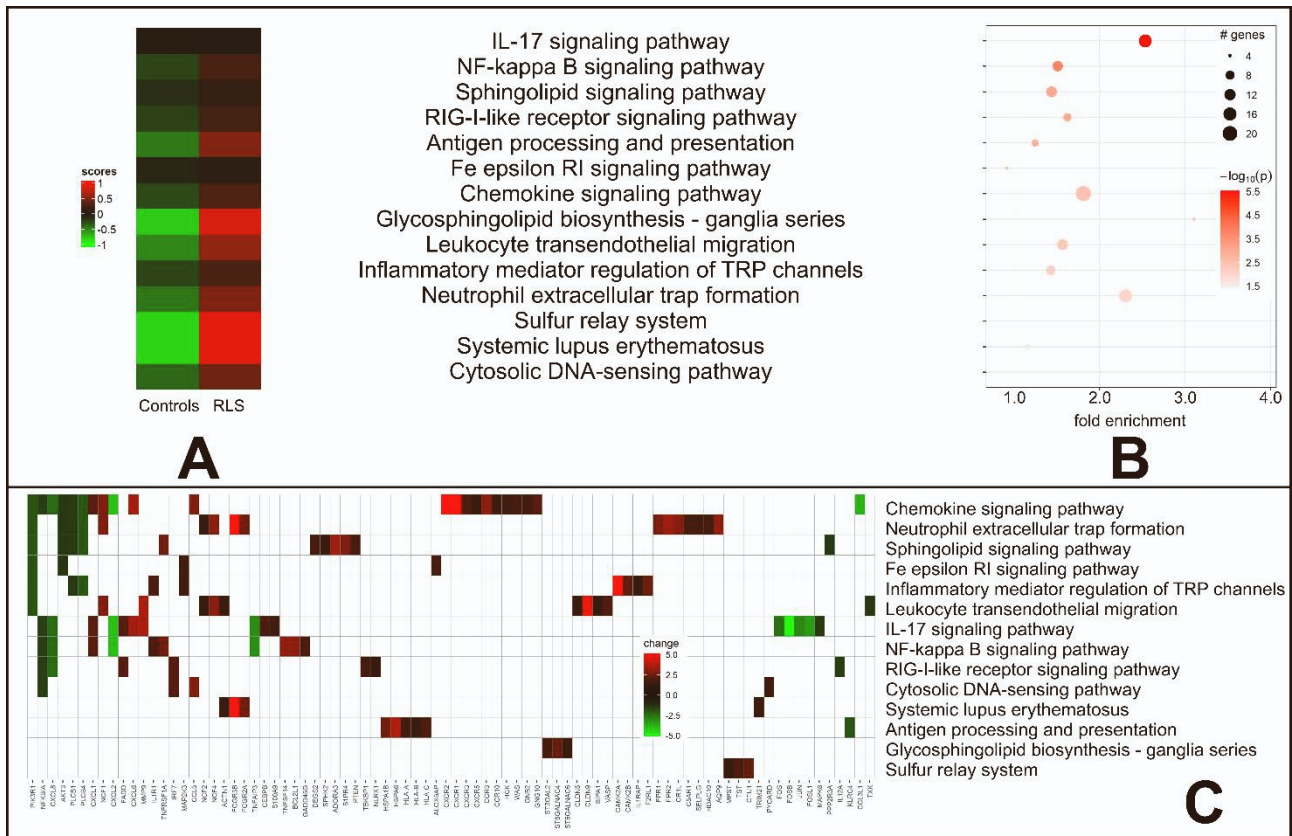

**Supplemental Figure S4 (related to Table1).**

Statistically significant pathways found by pathfinder involved in immunology. Panel A: The heatmap shows the average of aggregated term scores per sample for patients with RLS and healthy controls (CTRL). Panel B: Bubble plot of selected enrichment KEGG pathways. P values were shown by different colors, the size of bubbles indicates the gene count of each pathway. Panel C: Term-Gene Heatmap, shows the heatmap of genes that are involved in the enriched terms, as well as the common or distinct genes between different terms. The tile colors indicate the change values.

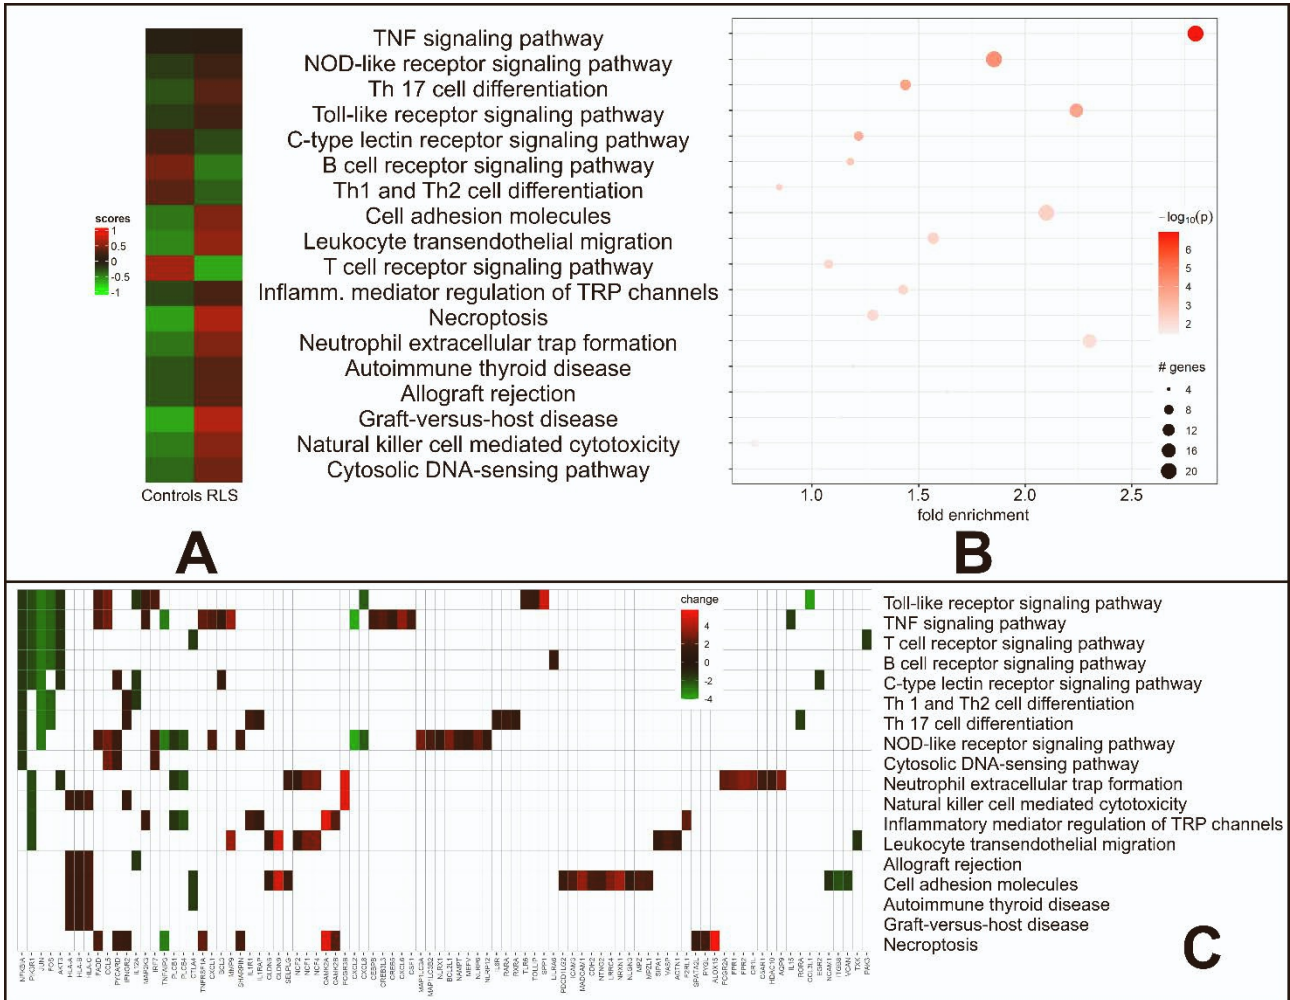

**Supplementary Figure S5 (related to Table1).**

Statistically significant pathways found by pathfinder involved in neurodegeneration. Panel A: The heatmap shows the average of aggregated term scores per sample for patients with RLS and healthy controls (CTRL). Panel B: Bubble plot of selected enrichment KEGG pathways. P values were shown by different colors, the size of bubbles indicates the gene count of each pathway. Panel C: Term-Gene Heatmap, shows the heatmap of genes that are involved in the enriched terms, as well as the common or distinct genes between different terms. The tile colors indicate the change values.

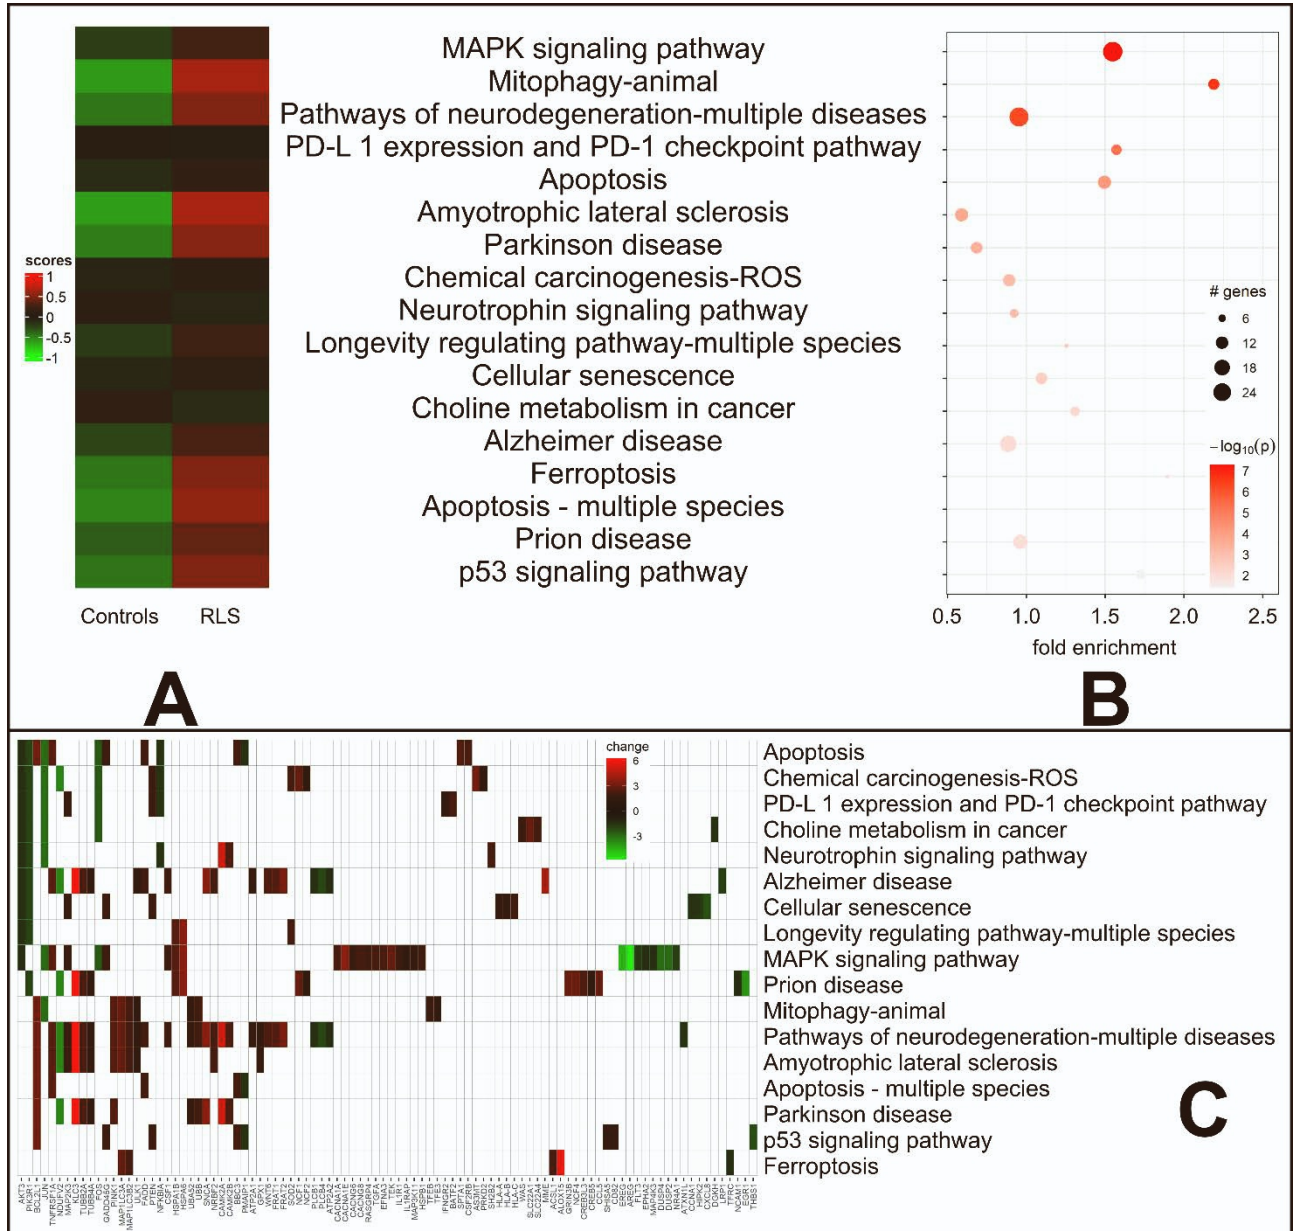

**Supplemental Figure S6 (related to Table1).**

Statistically significant pathways found by pathfinder involved in cancer. Panel A: The heatmap shows the average of aggregated term scores per sample for patients with RLS and healthy controls (CTRL). Panel B: Bubble plot of selected enrichment KEGG pathways. P values were shown by different colors, the size of bubbles indicates the gene count of each pathway. Panel C: Term-Gene Heatmap, shows the heatmap of genes that are involved in the enriched terms, as well as the common or distinct genes between different terms. The tile colors indicate the change values.

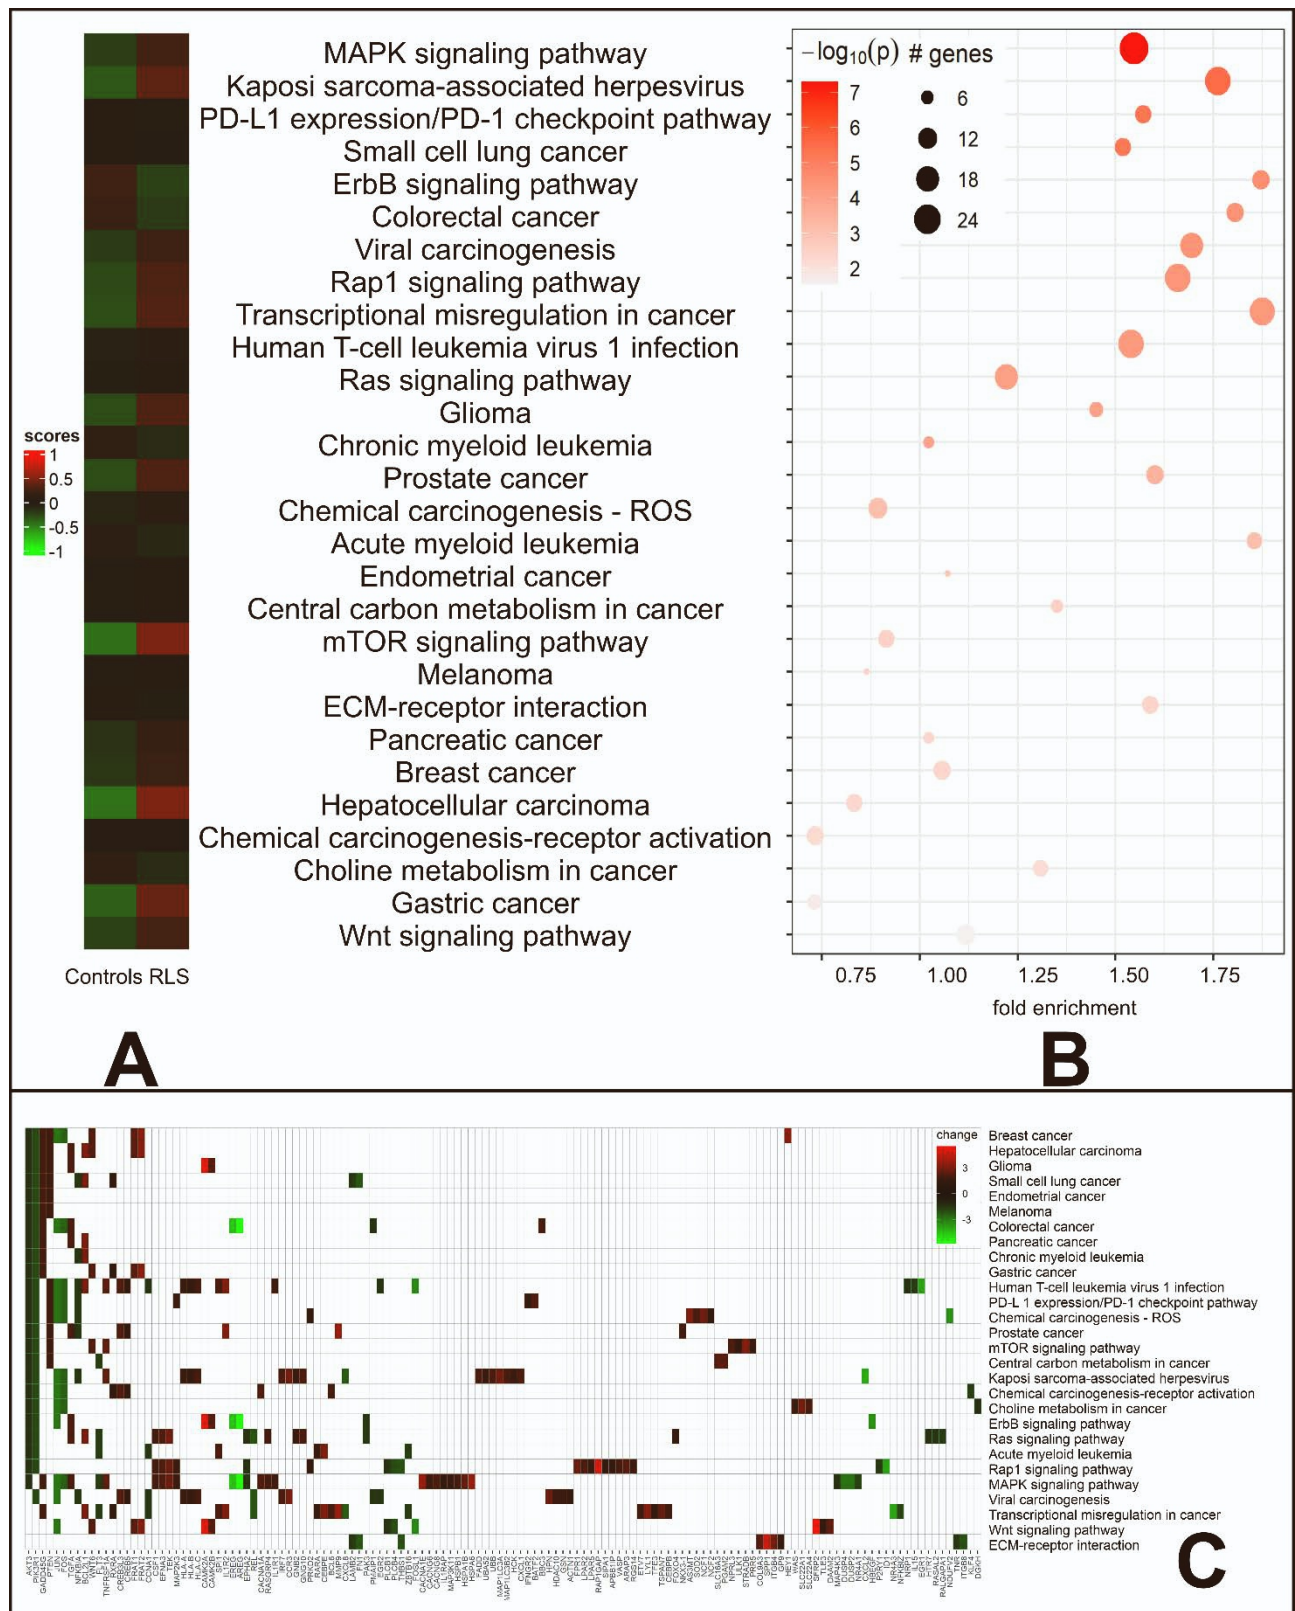

**Supplemental Figure S7 (related to Table1).**

Statistically significant pathways found by pathfinder involved in neurotransmitters. Panel A: The heatmap shows the average of aggregated term scores per sample for patients with RLS and healthy controls (CTRL). Panel B: Bubble plot of selected enrichment KEGG pathways. P values were shown by different colors, the size of bubbles indicates the gene count of each pathway. Panel C: Term-Gene Heatmap, shows the heatmap of genes that are involved in the enriched terms, as well as the common or distinct genes between different terms. The tile colors indicate the change values.

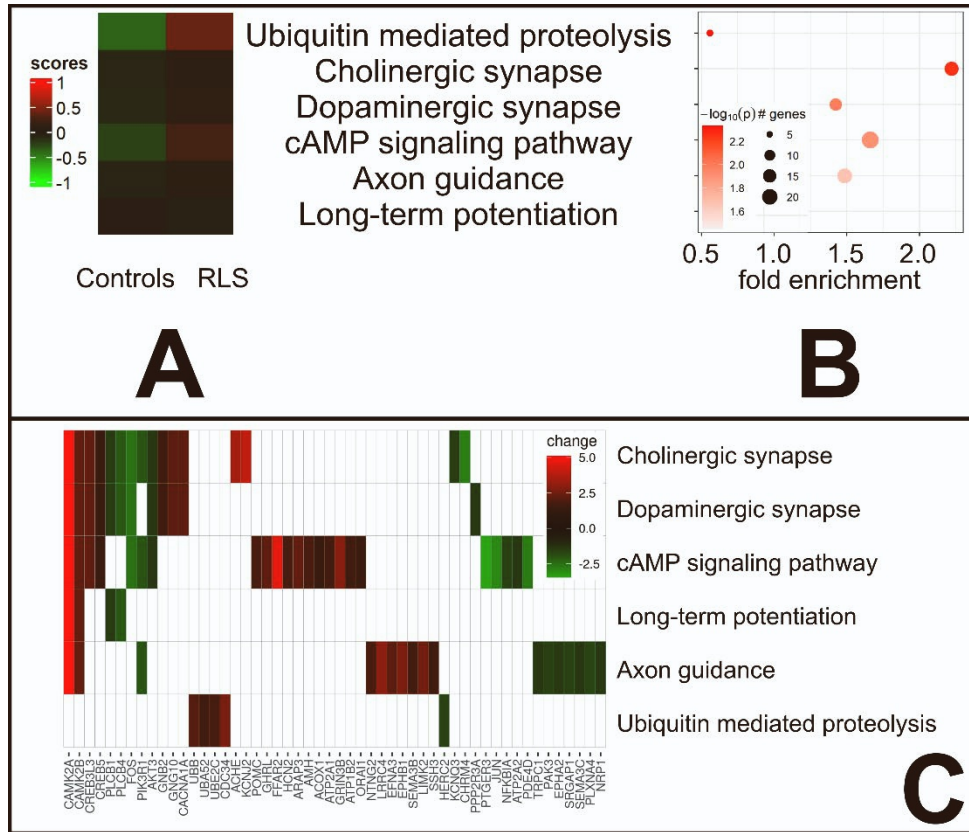



**Supplemental Figure S8 (related to Table1).**

Statistically significant pathways found by pathfinder involved in cellular processes. Panel A: The heatmap shows the average of aggregated term scores per sample for patients with RLS and healthy controls (CTRL). Panel B: Bubble plot of selected enrichment KEGG pathways. P values were shown by different colors, the size of bubbles indicates the gene count of each pathway. Panel C: Term-Gene Heatmap, shows the heatmap of genes that are involved in the enriched terms, as well as the common or distinct genes between different terms. The tile colors indicate the change values.

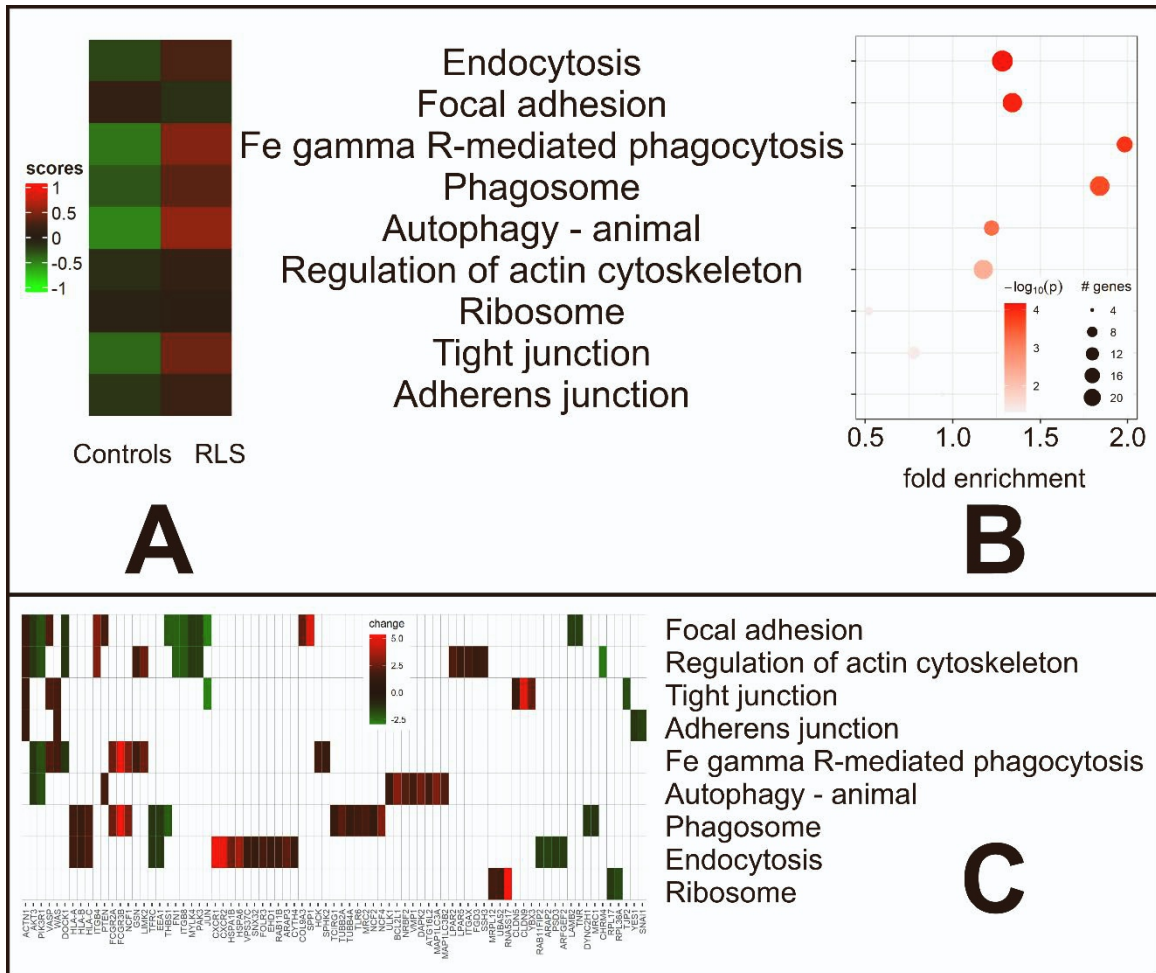

**Supplemental Figure S9 (related to Table1).**

Statistically significant pathways found by pathfinder involved in blood. Panel A: The heatmap shows the average of aggregated term scores per sample for patients with RLS and healthy controls (CTRL). Panel B: Bubble plot of selected enrichment KEGG pathways. P values were shown by different colors, the size of bubbles indicates the gene count of each pathway. Panel C: Term-Gene Heatmap, shows the heatmap of genes that are involved in the enriched terms, as well as the common or distinct genes between different terms. The tile colors indicate the change values.

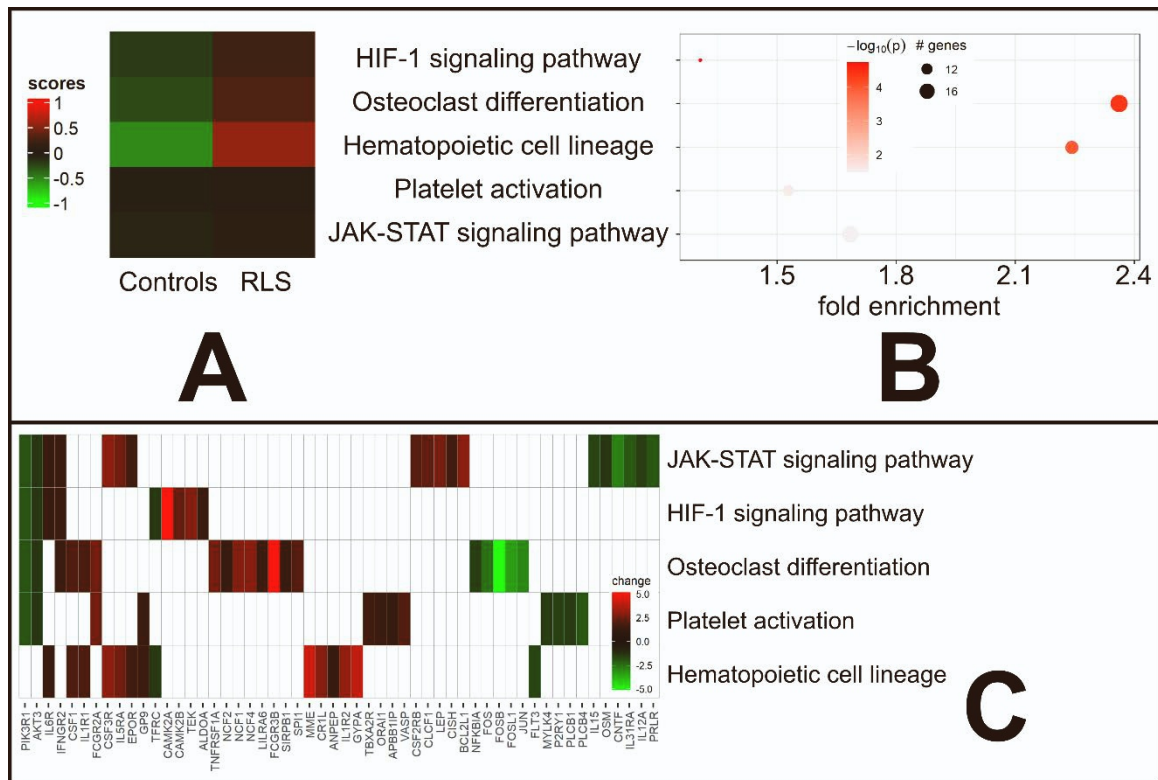

**Supplemental Figure S10 (related to Table1).**

Statistically significant pathways found by pathfinder involved in metabolism. Panel A: The heatmap shows the average of aggregated term scores per sample for patients with RLS and healthy controls (CTRL). Panel B: Bubble plot of selected enrichment KEGG pathways. P values were shown by different colors, the size of bubbles indicates the gene count of each pathway. Panel C: Term-Gene Heatmap, shows the heatmap of genes that are involved in the enriched terms, as well as the common or distinct genes between different terms. The tile colors indicate the change values.

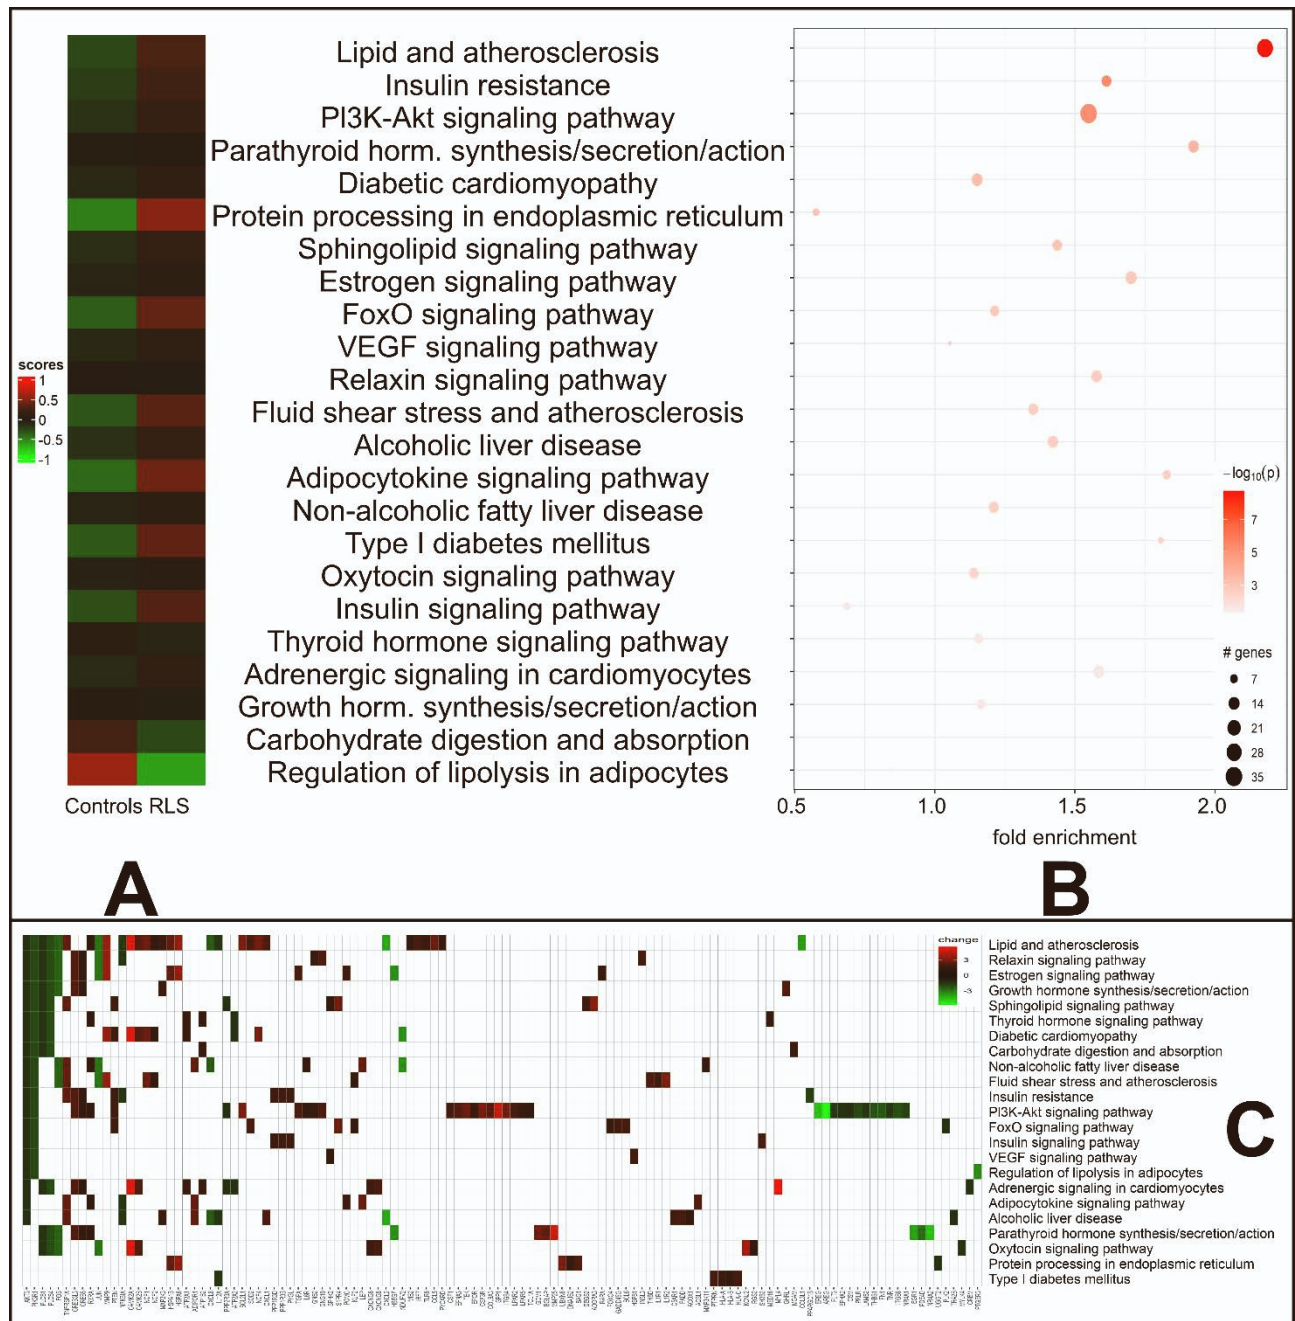

**Supplemental Table S2. Gene ontology enrichment analysis: molecular functions, related to Figure 2.**

| ID         | Molecular Functions (MF)                                                        | Fold_Enrichment | occurrence | support | lowest_p    | highest_p   | Up_regulated                                                                                                                                | Down_regulated                                                                                                                   |
|------------|---------------------------------------------------------------------------------|-----------------|------------|---------|-------------|-------------|---------------------------------------------------------------------------------------------------------------------------------------------|----------------------------------------------------------------------------------------------------------------------------------|
| GO:0003700 | DNA-binding transcription factor activity                                       | 1.96198         | 10         | 0.07692 | 2.30078E-16 | 1.98818E-12 | BCL6, NR2F6, FOXD2, GATA1, FOXO4, NFE2, NFIX, NKX3-1, RARA, RFX2, RXRA, SPI1, TAL1, TFE3, TFEB, GCM1, CREB5, KLF2, KLF1, HEY1, SOX6, ZNF746 | ATF3, KLF9, EGR1, EGR2, ELF3, FOS, JUN, PLAG1, RORA, KLF10, TRPS1, FOSL1, KLF11, NFAT5, KLF12                                    |
| GO:0000978 | RNA polymerase II cis-regulatory region sequence-specific DNA binding           | 1.94850         | 10         | 0.07490 | 4.06737E-15 | 9.9223E-14  | CEBPE, GATA1, IRF7, MXD1, NKX3-1, OTX1, RARA, RFX2, RXRA, SPI1, GCM1, LITAF, KLF1, PRDM5, WBP2, ZNF746, MYPOP, MEF2B                        | ZFXH3, ATF3, EGR1, EGR2, FOS, JUN, MYBL1, PER1, PLAG1, REL, RORA, KLF10, ZNF711, ZBTB16, FOSL1, NRIP1, KLF4, NFAT5, KLF12, GLIS3 |
| GO:0000976 | transcription cis-regulatory region binding                                     | 2.19712         | 10         | 0.09400 | 1.96294E-11 | 5.53382E-10 | CEBPB, GATA1, NKX3-1, RXRA, SNCA, SPI1, TAL1, TFE3, TFEB, RNF10, BASP1, KLF1, PRDM5, SOX6, CREB3L3, ZNF746, ZNF579                          | ATF3, EGR1, EGR2, FOS, JUN, TAF9, KLF11, KLF4, ZBED4, ZBTB20, ZBED6                                                              |
| GO:0001227 | DNA-binding transcription repressor activity, RNA polymerase II-specific        | 2.13979         | 10         | 0.07794 | 1.0731E-10  | 4.08266E-09 | BCL6, CEBPB, ERF, MXD1, MXI1, PRDM5, HEY1, ETV7, ZNF746, MYPOP                                                                              | ZFXH3, ATF3, CREM, JUN, SNAI1, TRPS1, ZBTB16, KLF12, TFEC, ZBTB21, ZBTB10, GLIS3, ZBED6                                          |
| GO:0005096 | GTPase activator activity                                                       | 2.64700         | 10         | 0.03133 | 3.31001E-09 | 0.000898102 | RAP1GAP, RGS2, SIPA1, NPRL3, CDC42EP2, RGS14, ADAP1, SH3BP1, ARHGAP9, ARAP3                                                                 | DOCK1, JUN, RGS1, NRIP1, ARHGAP32, PLCB1, ARHGAP8, ERFF1, ARHGAP31, SRGAP1, ARHGAP21, SYDE2, RALGAP1                             |
| GO:0000977 | RNA polymerase II transcription regulatory region sequence-specific DNA binding | 1.71361         | 10         | 0.03038 | 8.06687E-09 | 2.48163E-05 | CEBPB, GATA1, MXI1, RARA, RXRA, ETV7, CREB3L3                                                                                               | ATF3, CREM, EGR1, RORA, SNAI1, TRPS1, ZBED4, ZBTB10                                                                              |
| GO:0061629 | RNA polymerase II-specific DNA-binding transcription factor binding             | 1.00888         | 10         | 0.04103 | 1.99995E-08 | 6.72228E-05 | GATA1, HSPB1, SPI1, TAL1, HEY1                                                                                                              | EGR2, FOS, JUN, KLF4, HIPK2                                                                                                      |
| GO:0001228 | DNA-binding transcription activator activity, RNA polymerase II-specific        | 1.61721         | 10         | 0.04568 | 1.19603E-07 | 9.06924E-06 | CEBPE, FOXD2, GATA1, FOXO4, OTX1, GCM1, LITAF, CREB3L3, SCX, MEF2B                                                                          | ATF3, EGR1, EGR2, ELF3, FOS, NR4A1, JUN, MYBL1, NR4A2, PLAG1, REL, KLF10, NR4A3, KLF4, ZBED4, NFAT5, TFEC, GLIS3                 |
| GO:0004674 | protein serine/threonine kinase activity                                        | 1.39514         | 10         | 0.00524 | 1.64912E-07 | 0.027582621 | CAMK2A, LIMK2, MAP3K11, ULK1, DYRK3, DAPK2, PRKD2, PINK1, WNK2, ALPK1, NUAQ2, TSSK6                                                         | PAK3, MAPK6, MAP4K3, NUAQ1, AKT3, PLK2, HIPK2, ACVR1C, TTBK2, SIK1                                                               |
| GO:0003779 | actin binding                                                                   | 2.52306         | 10         | 0.06635 | 3.80783E-07 | 7.94145E-07 | ALDOA, CEACAM1, DMTN, GSN, HPCA, MEFV, SNCA, SPTB, TMOD1, AVIL, PLEKHG3, MSRB1, FHDC1                                                       | SPTBN1, SYNE2, MACF1, CCDC88A, VASH2, GAS2L3                                                                                     |
| GO:0003677 | DNA binding                                                                     | 1.08590         | 10         | 0.03210 | 6.92225E-07 | 1.19676E-06 | CEBPB, GATA1, IMPDH1, IRF7, LYL1, FOXO4, NFE2, RFX2, SLPI, GCM1, OASL, KLF2, MAP15, ISL2, MBD6, SCX                                         | EGR1, FMR1, FOSB, NR4A1, JUN, NR4A2, RORA, TAF9, ZBTB16, KLF12                                                                   |
| GO:0004601 | peroxidase activity                                                             | 4.43907         | 7          | 0.00552 | 2.66742E-06 | 0.00169606  | HBA1, HBA2, HBB, PRDX5                                                                                                                      |                                                                                                                                  |
| GO:0000981 | DNA-binding transcription factor activity, RNA polymerase II-specific           | 1.98017         | 10         | 0.02618 | 3.32953E-06 | 7.92434E-06 | CEBPB, IRF7, NKX3-1, SPI1, GCM1, KLF2, HEY1, ZNF579                                                                                         | ZFXH3, EGR2, JUN, ZNF711, KLF11                                                                                                  |
| GO:0001221 | transcription coregulator binding                                               | 3.21450         | 10         | 0.02073 | 7.87504E-06 | 2.56345E-05 | GATA1, RXRA                                                                                                                                 | FOS, RORA, CHD6, ZNF618                                                                                                          |
| GO:0043565 | sequence-specific DNA binding                                                   | 1.28841         | 7          | 0.00552 | 8.50191E-06 | 0.028126561 | BCL6, NR2F6, ERF, FOXD2, GATA1, HLX, FOXO4, NFE2, NKX3-1, RXRA, SPI1, PRDM5, SCX                                                            | EGR1, EGR2, RORA, ZNF711                                                                                                         |
| GO:0140297 | DNA-binding transcription factor binding                                        | 1.03578         | 10         | 0.00524 | 2.35796E-05 | 0.000635591 | BCL3, BCL6, FOXO4, NKX3-1, SPI1, PRDM5, NFE4, ZNF653                                                                                        | TAF9                                                                                                                             |
| GO:0042826 | histone deacetylase binding                                                     | 1.66465         | 10         | 0.00524 | 3.7554E-05  | 0.001387723 | BCL3, HSPA1B, NKX3-1, SPI1, TAL1, GCM1, HDAC10, MEF2B                                                                                       | UHRF1BP1                                                                                                                         |
| GO:0004713 | protein tyrosine kinase activity                                                | 1.03578         | 10         | 0.01519 | 0.000119964 | 0.005997275 | HCK, TEK                                                                                                                                    | FLT3, YES1                                                                                                                       |
| GO:0051011 | microtubule minus-end binding                                                   | 7.76838         | 10         | 0.02564 | 0.000125701 | 0.001460066 |                                                                                                                                             | CAMSAP2, MACF1, CEP290                                                                                                           |
| GO:0043422 | protein kinase B binding                                                        | 5.82628         | 10         | 0.00534 | 0.000351045 | 0.00037731  | RARA, PINK1                                                                                                                                 | CCDC88A                                                                                                                          |
| GO:0051082 | unfolded protein binding                                                        | 0.89635         | 8          | 0.00548 | 0.000696395 | 0.047179577 | DNAJB2, HSPA1B, HSPA6                                                                                                                       |                                                                                                                                  |
| GO:0019899 | enzyme binding                                                                  | 1.22256         | 10         | 0.06283 | 0.001177021 | 0.005774696 | ANK1, CBS, HSPA1B, HSPA6, IL6R, FOXO4, PTEN, RARA, RXRA, SPI1, ZBTB7B, SOX6                                                                 | ZFXH3, ATP2A2, FN1, JUN, NFKBIA, PDE4D, YES1, PPF22, SACS                                                                        |
| GO:0001217 | DNA-binding transcription repressor activity, RNA polymerase II-specific        | 6.21470         | 10         | 0.00524 | 0.001202127 | 0.001440964 | RARA, SPI1, ZBTB7B, SOX6                                                                                                                    |                                                                                                                                  |
| GO:0051010 | microtubule plus-end binding                                                    | 2.58946         | 7          | 0.00521 | 0.001371919 | 0.001474368 |                                                                                                                                             | DST, TTBK2                                                                                                                       |
| GO:0044548 | S100 protein binding                                                            | 3.58540         | 10         | 0.01047 | 0.002199423 | 0.007708244 | S100A11                                                                                                                                     | ATP2A2, AHNAK                                                                                                                    |
| GO:0002020 | protease binding                                                                | 1.64507         | 9          | 0.00524 | 0.002812034 | 0.003331847 | F2RL1, INSL3, FADD, PYCARD, CD177, PINK1                                                                                                    | FN1, TNFAIP3, SLC2A13                                                                                                            |
| GO:0044325 | transmembrane transporter binding                                               | 1.36587         | 10         | 0.01538 | 0.002874712 | 0.028677641 | ACTN1, FGF13, TCAP                                                                                                                          | ATP2A2, FMR1, PDE4D, YES1, AKAP9                                                                                                 |
| GO:0004842 | ubiquitin-protein transferase activity                                          | 0.96014         | 9          | 0.00565 | 0.00300452  | 0.006107998 | CDC34, TRIM21, KLHL21, UBE2C, FBXO7, TRIM47, RNF182, RNF508                                                                                 | TNFAIP3, RNF217, SHPRH                                                                                                           |
| GO:0004714 | transmembrane receptor protein tyrosine kinase activity                         | 3.10735         | 10         | 0.01334 | 0.003257946 | 0.01220986  |                                                                                                                                             | EPHA2, FLT3, DDR2                                                                                                                |
| GO:0070412 | R-SMAD binding                                                                  | 1.55368         | 10         | 0.00524 | 0.003360715 | 0.003360715 |                                                                                                                                             | FOS, JUN                                                                                                                         |
| GO:0008017 | microtubule binding                                                             | 1.84961         | 7          | 0.00524 | 0.003852576 | 0.004339937 | FGF13, S100A9, RGS14, MAP15, ENKD1, SGIP1, FHDC1, NIPA1, NIPA2, NIPA3                                                                       | FMR1, SBDS, CCDC88A, VASH2, MAP9, JMY, GAS2L3                                                                                    |
| GO:0004385 | guanylate kinase activity                                                       | 7.76838         | 5          | 0.00543 | 0.003882767 | 0.034406042 | GUK1, MPP1                                                                                                                                  | TJP2                                                                                                                             |
| GO:0051020 | GTPase binding                                                                  | 1.86441         | 10         | 0.00534 | 0.005031357 | 0.005566329 | GNB2, ULK1                                                                                                                                  | SPTBN1                                                                                                                           |
| GO:0061630 | ubiquitin protein ligase activity                                               | 1.43247         | 10         | 0.01047 | 0.005219565 | 0.005219565 | PEX12, TRIM21, RNF10, UBE2C, IRF2BP1, IRF2BPL, NFE2L3, TRIM18, TRIM6, RNF67                                                                 | HERC2, MYCBP2, SHPRH                                                                                                             |
| GO:0005509 | calcium ion binding                                                             | 1.69358         | 10         | 0.01644 | 0.005373903 | 0.01186094  | AOC1, ADAM8, ALPL, ATP2A1, CDH2, DNASE1L2, GSN, NIPA1, NIPA2, NIPA3, TRAP1, TRAP2, TRAP3, TRAP6, TRAP7, TRAP8                               | ATP2A2, LRP1                                                                                                                     |
| GO:0003729 | mRNA binding                                                                    | 1.10977         | 1          | 0.00500 | 0.005498369 | 0.005498369 | SLPI                                                                                                                                        | EIF4A1, FMR1, TRA2B, PEG10                                                                                                       |
| GO:0043130 | ubiquitin binding                                                               | 1.29473         | 10         | 0.01047 | 0.00558299  | 0.008527822 | DNAJB2, HSPB1, FBXO7                                                                                                                        | TNFAIP3                                                                                                                          |
| GO:0004879 | nuclear receptor activity                                                       | 2.30174         | 10         | 0.00524 | 0.006387017 | 0.011178324 | NKX3-1, RARA, RXRA                                                                                                                          | NR4A2                                                                                                                            |
| GO:0043236 | laminin binding                                                                 | 4.78054         | 2          | 0.00545 | 0.006416855 | 0.006416855 | ACHE, BCAM                                                                                                                                  | THBS1, ADAM9                                                                                                                     |
| GO:0043027 | cysteine-type endopeptidase inhibitor                                           | 2.91314         | 1          | 0.00500 | 0.00746682  | 0.00746682  | SNCA, TNFSF14, PRDX5                                                                                                                        |                                                                                                                                  |
| GO:0044183 | protein folding chaperone                                                       | 1.60725         | 10         | 0.01090 | 0.007964448 | 0.013933495 | HSPA1B, HSPB1, FKBP8                                                                                                                        |                                                                                                                                  |
| GO:0031625 | ubiquitin protein ligase binding                                                | 0.89145         | 10         | 0.01067 | 0.008068633 | 0.043344395 | BAG1, CBS, HSPA1B, SLC22A18, FBXO7, PINK1, NIPA1, NIPA2, NIPA3                                                                              | EGR2, JUN, NFKBIA, PER1, HERC2, SHPRH                                                                                            |
| GO:0005178 | integrin binding                                                                | 1.65285         | 6          | 0.01013 | 0.008634079 | 0.009835887 | ACTN1, ICAM3, ITGAX, SFRP2, SPP1, CD177                                                                                                     | DST, FN1, THBS1, ADAM9                                                                                                           |
| GO:0005085 | guanyl-nucleotide exchange factor activity                                      | 1.54459         | 5          | 0.00546 | 0.008839371 | 0.048677822 | RAB3IL1, TBXA2R, DENND3, PLEKHG3, CYTH4, SH3BP5L, NIPA1, NIPA2, NIPA3                                                                       | DOCK1, MCF2, TRIO, ARFGEF2, MYCBP2, CCDC88A, FGD6, PIP5K1A, RHOGEF, RHOGEF2                                                      |
| GO:0004672 | protein kinase activity                                                         | 1.13182         | 9          | 0.00524 | 0.009325366 | 0.010495328 | MAP3K11, CCL5, TEK, DYRK3, PRKD2, STRADB, PINK1                                                                                             | MAP4K3, AKT3, HIPK2, TTBK2                                                                                                       |
| GO:0019838 | growth factor binding                                                           | 3.45261         | 9          | 0.00524 | 0.010843138 | 0.028054681 |                                                                                                                                             | EPHA2, NRP2, NRP1, ACVR1C                                                                                                        |
| GO:0003725 | double-stranded RNA binding                                                     | 1.36287         | 8          | 0.00524 | 0.011153306 | 0.013852135 | ACTN1, OASL, NLRP6                                                                                                                          | EIF4A1, TFRC                                                                                                                     |
| GO:0008373 | sialyltransferase activity                                                      | 5.54884         | 9          | 0.00524 | 0.011632326 | 0.014241075 | ST3GAL2, ST3GAL4, ST6GALNAC2, ST6GALNAC4, ST6GALNAC5                                                                                        |                                                                                                                                  |
| GO:0003730 | mRNA 3'-UTR binding                                                             | 0.71270         | 10         | 0.01334 | 0.013572564 | 0.031863305 | YBX3, IGF2BP2, MIR106B, MIR93                                                                                                               | FMR1                                                                                                                             |
| GO:0030297 | transmembrane receptor protein tyrosine kinase activity                         | 5.82628         | 3          | 0.00552 | 0.015267736 | 0.020844166 |                                                                                                                                             | AREG, HBEGF, EREG                                                                                                                |
| GO:0030331 | nuclear estrogen receptor binding                                               | 2.58946         | 8          | 0.00524 | 0.015650228 | 0.028006737 | NKX3-1, PADI2, WBP2                                                                                                                         | NRIP1, PPARGC1B                                                                                                                  |
| GO:0030544 | Hsp70 protein binding                                                           | 2.21954         | 10         | 0.00524 | 0.015967072 | 0.017247262 | DNAJB2, SNCA                                                                                                                                | PPEF2, SACS                                                                                                                      |
| GO:0004722 | protein serine/threonine phosphatase                                            | 1.88324         | 10         | 0.00524 | 0.017394537 | 0.024423839 | PPP1R3D, PTEN                                                                                                                               | CDC14A, PPM1L                                                                                                                    |
| GO:0042605 | peptide antigen binding                                                         | 2.58946         | 10         | 0.01117 | 0.017488823 | 0.036572528 | FCGRT, HLA-A, HLA-B, HLA-C                                                                                                                  |                                                                                                                                  |
| GO:0001222 | transcription corepressor binding                                               | 1.22659         | 9          | 0.00524 | 0.018238596 | 0.018238596 | BCL6                                                                                                                                        | RORA, ZBTB16                                                                                                                     |
| GO:0008013 | beta-catenin binding                                                            | 0.92757         | 10         | 0.00524 | 0.01972891  | 0.021259418 | CDH2, FOXO4, SLC9A3R1                                                                                                                       | NR4A2                                                                                                                            |
| GO:0004715 | non-membrane spanning protein tyrosine kinase activity                          | 1.66465         | 10         | 0.00524 | 0.021489357 | 0.023042461 | BMX                                                                                                                                         | YES1, PEAK1                                                                                                                      |
| GO:0003711 | transcription elongation factor activity                                        | 3.10735         | 10         | 0.00524 | 0.021610608 | 0.02295922  |                                                                                                                                             | EAF2                                                                                                                             |
| GO:0042809 | nuclear vitamin D receptor binding                                              | 3.10735         | 1          | 0.00524 | 0.021610608 | 0.021610608 | RXRA                                                                                                                                        |                                                                                                                                  |
| GO:0003723 | RNA binding                                                                     | 0.48807         | 1          | 0.00500 | 0.022731475 | 0.022731475 | IFIT1, MRPL12                                                                                                                               | FMR1, TRA2B, ZBED4, SRSF10                                                                                                       |
| GO:0097718 | disordered domain specific binding                                              | 1.35102         | 10         | 0.00524 | 0.023333366 | 0.048795073 | FKBP8                                                                                                                                       | FN1                                                                                                                              |
| GO:0140444 | cytoskeleton-nuclear membrane anchor                                            | 3.10735         | 9          | 0.00524 | 0.024348512 | 0.024348512 |                                                                                                                                             | SYNE2                                                                                                                            |
| GO:0055131 | C3HC4-type RING finger domain binding                                           | 5.17892         | 10         | 0.01614 | 0.026691195 | 0.047803099 | HSPA1B, PINK1                                                                                                                               |                                                                                                                                  |
| GO:0001784 | phosphotyrosine residue binding                                                 | 1.37089         | 10         | 0.01538 | 0.026756086 | 0.031271022 | HCK                                                                                                                                         | PIK3R1, YES1                                                                                                                     |
| GO:0016176 | superoxide-generating NADPH oxidase                                             | 6.21470         | 10         | 0.00524 | 0.027249095 | 0.027249095 | NCF2, NCF4                                                                                                                                  |                                                                                                                                  |
| GO:0003682 | chromatin binding                                                               | 0.96556         | 1          | 0.00500 | 0.028334327 | 0.028334327 | BCL6, RARA, SPI1, TAL1, MBD6, LRWD1                                                                                                         | EGR2, FMR1, MLLT10, NFAT5, AUTS2                                                                                                 |
| GO:0003714 | transcription corepressor activity                                              | 0.97869         | 10         | 0.00524 | 0.028343984 | 0.0322514   | BCL3, CBFA2T3, BASP1, IRF2BP1, ZNF653                                                                                                       | NRIP1, AASS, HIPK2                                                                                                               |
| GO:0031267 | small GTPase binding                                                            | 1.35947         | 2          | 0.00506 | 0.029375456 | 0.029375456 | RAP1GAP, WAS, ULK1, YBX3, CDC42EP2, EHD1, FGD3                                                                                              | CHML, RABGGTB, MYCBP2, EXPH5, DMXL2, FGD6, RIC1                                                                                  |
| GO:0031490 | chromatin DNA binding                                                           | 2.48588         | 1          | 0.00500 | 0.030199842 | 0.030199842 | GATA1, RARA, WBP2                                                                                                                           | PER1                                                                                                                             |
| GO:0043120 | tumor necrosis factor binding                                                   | 3.10735         | 10         | 0.00524 | 0.031904801 | 0.033537947 | TNFRSF1A                                                                                                                                    |                                                                                                                                  |



**Supplemental Table S4.** Gene ontology enrichment analysis: cellular components, related to Figure 2.

| ID         | Cellular Component                                | Fold_Enrichment | occurrence | support | lowest_p    | highest_p   | Up_regulated                                                                                                                                                                           | Down_regulated                                                                                                                               |
|------------|---------------------------------------------------|-----------------|------------|---------|-------------|-------------|----------------------------------------------------------------------------------------------------------------------------------------------------------------------------------------|----------------------------------------------------------------------------------------------------------------------------------------------|
| GO:0005813 | centrosome                                        | 1.23744         | 10         | 0.02632 | 2.62069E-14 | 4.58249E-12 | BCL2L1, HSPA1B, LIMK2, MAK, MAP3K11, RGS14, CCDC85B, DCAF12, MAP1S, MZT2B, ALPK1, B9D2, ENKD1, CEP19, TPGS1, CFAP58, HEPACAM2                                                          | PLAG1, XRCC2, LUZP1, ALMS1, CDC14A, PDE4DIP, AKAP9, PLK2, ANKRD26, CAMSAP2, RTTN, AHI1, CNTLN, ODF2L, CCDC14, CEP290, SPICE1, CEP112, CEP85L |
| GO:0090575 | RNA polymerase II transcription regulator complex | 2.26578         | 10         | 0.07857 | 1.07967E-08 | 1.87034E-08 | CEBPB, CEBPD, CEBPE, MXI1, NFE2, RARA, RXRA, BATF2                                                                                                                                     | ATF3, FOS, JUN, FOSL1, HIPK2, BACH2                                                                                                          |
| GO:0015629 | actin cytoskeleton                                | 1.83299         | 10         | 0.06433 | 1.64303E-08 | 2.35803E-08 | ALDOA, DBN1, DMTN, RARA, SNCA, SPTA1, SPTB, VASP, WAS, PDLIM7, SLC9A3R1, CORIN, MSRB1                                                                                                  | NEB, DDR2, AUTS2, ARHGAP21, AHNAK, PEAK1, DGKH, GAS2L3                                                                                       |
| GO:0000785 | chromatin                                         | 1.22123         | 10         | 0.02717 | 4.00845E-08 | 7.51291E-08 | MXD1, RARA, RXRA, SPI1, TAL1, TGM2, KLF2, KLF1, WBP2, PINK1                                                                                                                            | EGR1, TRPS1, ZNF711, NRIP1, KLF4, PLCB1, ZNF618, ZNF827                                                                                      |
| GO:0005814 | centriole                                         | 2.08225         | 10         | 0.03085 | 6.02772E-08 | 0.000415387 | HSPA1B, HSPA6, ENKD1, CEP19                                                                                                                                                            | ALMS1, PLK2, RTTN, AHI1, CNTLN, CCDC88A, CEP290, TTBK2, SPICE1                                                                               |
| GO:0034451 | centriolar satellite                              | 1.65927         | 10         | 0.00606 | 2.99075E-06 | 0.000315058 | MPP1, TEK, DYSF, CYTH4, ZMYND10, RPP25                                                                                                                                                 | ODF2L, CCDC14, CEP290, CCDC18, ZBED6                                                                                                         |
| GO:0009986 | cell surface                                      | 1.65842         | 10         | 0.01124 | 3.72535E-06 | 0.001119497 | ADAM8, CEACAM1, CA4, CDH2, CCR10, HLA-A, HLA-B, HLA-C, HPN, CXCR2, ITGAX, ITGB4, TEK, TGFA, THBD, AOC3, LPAR2, NRXN1, SIRPB1, ABCA7, TSPEAR, NLGN3, RTN4R, TREM1, PLVAP, CLEC9A, SMIM1 | AREG, HBEGF, EPHA2, ITGB8, NCAM1, PRLR, TFRC, TGFBR3, THBS1, SLC4A4, ADAM9                                                                   |
| GO:0005833 | hemoglobin complex                                | 12.08414        | 10         | 0.03548 | 3.91824E-06 | 0.000233836 | HBA1, HBA2, HBB, HBD, HBG1, HBG2, HBZ                                                                                                                                                  |                                                                                                                                              |
| GO:0032010 | phagolysosome                                     | 12.42940        | 10         | 0.00543 | 2.56991E-05 | 2.79648E-05 | ADAM8, NCF2, NCF4, NCF1                                                                                                                                                                |                                                                                                                                              |
| GO:0005925 | focal adhesion                                    | 1.62324         | 10         | 0.01729 | 2.682E-05   | 0.002347353 | ACTN1, HCK, TNS1, VASP, PDLIM7, AVIL, LIM2, CASS4                                                                                                                                      | EPHA2, KLF11, NRP1, IL1RL1, SYNE2, PEAK1                                                                                                     |
| GO:0005743 | mitochondrial inner membrane                      | 0.51633         | 6          | 0.00536 | 3.58606E-05 | 4.28075E-05 | ALAS2, FECH, MRPL12, GCAT, MTG2, AURKAIP1, PINK1                                                                                                                                       | NDUFV2, NDUFAF5, ACAD11, MICU3                                                                                                               |
| GO:1904813 | ficolin-1-rich granule lumen                      | 2.13004         | 10         | 0.03700 | 5.66063E-05 | 0.016277186 | ALDOA, CDA, CFD, GSN, HBB, HSPA1B, HSPA6, IMPDH1, KRT1, MMP9, MND, PYGL, TNFAIP6, QPCT, PLEKHO2, IRLG1, CANT1                                                                          |                                                                                                                                              |
| GO:0031410 | cytoplasmic vesicle                               | 1.59937         | 10         | 0.01078 | 6.54532E-05 | 0.038662527 | DMTN, MME, TGFA, PRDX5, WLS, ANKRD9                                                                                                                                                    | DST, TFRC, NRP1, ARFGF2, MYOF, CCDC88A, JMY, STARD4                                                                                          |
| GO:0016323 | basolateral plasma membrane                       | 2.01195         | 8          | 0.01028 | 7.60244E-05 | 0.037091014 | AQP1, C5AR1, CA4, SLC29A1, SLC4A1, SLC6A9, SLC19A1, TEK, TGFA, BEST1, SLC16A3, HEPH, CALHM1                                                                                            | LRP1, TFRC, SLC4A4, SLC16A7, SLC4A7                                                                                                          |
| GO:0030667 | secretory granule membrane                        | 3.65571         | 10         | 0.01687 | 8.76325E-05 | 0.000572167 | ANPEP, RHOG, C5AR1, CA4, FCGR2A, FCGR3B, FPR1, HLA-B, HLA-C, CXCR1, CXCR2, ITGAX, MME, PTAFR, SIGLEC5, SIRPB1, RAB24, CD177, DOK3                                                      | ABCA13                                                                                                                                       |
| GO:0043020 | NADPH oxidase complex                             | 5.82628         | 10         | 0.00543 | 0.000143438 | 0.000156069 | NCF2, NCF4, NCF1                                                                                                                                                                       |                                                                                                                                              |
| GO:0030670 | phagocytic vesicle membrane                       | 1.89473         | 9          | 0.01075 | 0.000172725 | 0.000198052 | ANXA3, HLA-A, HLA-B, HLA-C, TCIRG1                                                                                                                                                     |                                                                                                                                              |
| GO:0042612 | MHC class I protein complex                       | 7.76838         | 10         | 0.06612 | 0.000178035 | 0.000258142 | HLA-A, HLA-B, HLA-C                                                                                                                                                                    |                                                                                                                                              |
| GO:0031095 | platelet dense tubular network membrane           | 7.76838         | 10         | 0.03373 | 0.00019835  | 0.032645283 | ATP2A1, DMTN, EHD1                                                                                                                                                                     | ATP2A2                                                                                                                                       |
| GO:0034774 | secretory granule lumen                           | 1.92491         | 10         | 0.03030 | 0.000339282 | 0.000523446 | ALDOA, CDA, CFD, GSN, HSPA6, IMPDH1, POMC, PYGL, S100A9, S100A11, S100P, PYCARD, GHRL, ARHGAP9                                                                                         |                                                                                                                                              |
| GO:0098978 | glutamatergic synapse                             | 1.29473         | 2          | 0.00514 | 0.000377976 | 0.000377976 | ACTN1, SPTB                                                                                                                                                                            | TRIO, AKAP9                                                                                                                                  |
| GO:0031901 | early endosome membrane                           | 1.28138         | 10         | 0.01720 | 0.000434593 | 0.011028712 | EPHB1, HLA-A, HLA-B, HLA-C, IFITM3, EHD1, WLS, UBXN6                                                                                                                                   |                                                                                                                                              |
| GO:0055038 | recycling endosome membrane                       | 1.52821         | 10         | 0.02424 | 0.0004915   | 0.009182286 | HLA-A, HLA-B, HLA-C, RAB11B, EHD1, PACSIN2                                                                                                                                             |                                                                                                                                              |
| GO:0000932 | P-body                                            | 0.83233         | 10         | 0.01087 | 0.000617777 | 0.000707984 | IGF2BP2, LSM14A                                                                                                                                                                        | TNRC6A                                                                                                                                       |
| GO:0005667 | transcription regulator complex                   | 1.72631         | 10         | 0.01687 | 0.000620252 | 0.000838227 | GATA1, RARA, RXRA, SPI1, TAL1, GCM1, SCX, MEF2B                                                                                                                                        | ZFXH3                                                                                                                                        |
| GO:0035102 | PRC1 complex                                      | 2.58946         | 1          | 0.00510 | 0.000717443 | 0.000717443 | PHC2                                                                                                                                                                                   | PHC3                                                                                                                                         |
| GO:0005741 | mitochondrial outer membrane                      | 1.40085         | 10         | 0.01078 | 0.000740882 | 0.016744412 | BCL2L1, ACSL1, UBA52, UBB, ULK1, PINK1, NLRX1, FAM210B                                                                                                                                 | PMAIP1, VPS13A, VPS13C                                                                                                                       |
| GO:0031093 | platelet alpha granule lumen                      | 1.91222         | 10         | 0.00543 | 0.000998654 | 0.00115695  | ACTN1, ALDOA, SERPING1, CFD, ORM1, TOR4A                                                                                                                                               | FN1, THBS1                                                                                                                                   |
| GO:0071682 | endocytic vesicle lumen                           | 2.58946         | 5          | 0.00541 | 0.001178976 | 0.011893833 | HBA1, HBA2, HBB                                                                                                                                                                        |                                                                                                                                              |
| GO:0005788 | endoplasmic reticulum lumen                       | 1.27066         | 10         | 0.00606 | 0.001455869 | 0.002706124 | BGLAP, SERPING1, CDH2, COL9A3, CSF1, PROC, SPP1, WNT6, RNASET2, TSPAN5, SHISA5, GHRL, COL18A1                                                                                          | COL19A1, VCAN, FN1, IL12A, KTN1, LAMB2, THBS1, UGGT2, COL24A1                                                                                |
| GO:0005882 | intermediate filament                             | 3.27090         | 9          | 0.00546 | 0.001547808 | 0.001707011 | RTN2                                                                                                                                                                                   | KRT5, PNN, SYNM                                                                                                                              |
| GO:0042995 | cell projection                                   | 4.94351         | 10         | 0.02796 | 0.001602149 | 0.002216997 | ACTN1, CACNA1A, PTEN, AVIL, MAP1S                                                                                                                                                      | FMR1, SLC2A13                                                                                                                                |
| GO:0005856 | cytoskeleton                                      | 1.48612         | 10         | 0.02710 | 0.002288726 | 0.014330526 | DBN1, EPB42, HSPB1, KRT1, S100A9, BASP1, IGF2BP2, PINK1                                                                                                                                | MCF2, AKAP9, TENM1                                                                                                                           |
| GO:0035580 | specific granule lumen                            | 3.56581         | 10         | 0.00543 | 0.002574622 | 0.003482318 | AOC1, CHI3L1, CNN2, FOLR3, CXCL1, ORM1, SLPI, PGLYRP1, QPCT, TOLLIP, IRLG1, CANT1                                                                                                      | PTX3, CEP290                                                                                                                                 |
| GO:0005759 | mitochondrial matrix                              | 0.86616         | 7          | 0.00578 | 0.003367373 | 0.02468337  | ALAS2, FECH, GPX1, MPST, SOD2, TST, MTHFS, PRDX5, MTG2, GLRX5, NT5M, ACS3, MRM1, ALKBH7, NAGS                                                                                          | AASS                                                                                                                                         |
| GO:0043235 | receptor complex                                  | 1.47429         | 1          | 0.00606 | 0.004199929 | 0.004199929 | CR1L, ITGB4, RXRA, TNFRSF1A, TLR6, ITLN1                                                                                                                                               | LRP1, TGFBR3, TRPC1, LRP8, CUBN, NRP1, NT5DC3                                                                                                |

|            |                                                        |         |    |         |             |             |                                                                                                                                                                                                                            |                                                                    |
|------------|--------------------------------------------------------|---------|----|---------|-------------|-------------|----------------------------------------------------------------------------------------------------------------------------------------------------------------------------------------------------------------------------|--------------------------------------------------------------------|
| GO:0031519 | PcG protein complex                                    | 1.47969 | 1  | 0.00510 | 0.004290476 | 0.004290476 | PHC2                                                                                                                                                                                                                       | PHC3                                                               |
| GO:0016234 | inclusion body                                         | 2.07157 | 10 | 0.00543 | 0.004699361 | 0.005216977 | HSPA1B, SNCA                                                                                                                                                                                                               |                                                                    |
| GO:0030669 | clathrin-coated endocytic vesicle membrane             | 1.35102 | 8  | 0.00562 | 0.005032529 | 0.007245398 | TGFA, KIAA0319                                                                                                                                                                                                             | AREG, HBEGF, EREG, TFRC                                            |
| GO:0016324 | apical plasma membrane                                 | 1.90077 | 5  | 0.00541 | 0.005874448 | 0.041956711 | AQP1, ATP1B2, CEACAM1, CA4, SLC29A1, IL6R, SLC22A18, PTEN, SLC6A8, SLC6A9, SLC19A1, SLC22A1, SLC22A4, STX3, TEK, MGAM, SLC16A3, SLC9A3R1, TCIRG1, ZMYND10, CYP4F12, SLC6A19                                                | CUBN                                                               |
| GO:0098797 | plasma membrane protein complex                        | 4.66103 | 10 | 0.01072 | 0.006438709 | 0.03063426  | SLC9A3R1                                                                                                                                                                                                                   | LRP1, AHNAK                                                        |
| GO:0045171 | intercellular bridge                                   | 1.32631 | 9  | 0.00546 | 0.006787162 | 0.007564576 | TUBB2A, TUBB4A, FAM50B, CYTH4, KLHDC8B                                                                                                                                                                                     | PRC1, RBM44                                                        |
| GO:0031463 | Cul3-RING ubiquitin ligase complex                     | 1.37089 | 10 | 0.01087 | 0.006960868 | 0.01141622  | KLHL21, KBTBD7                                                                                                                                                                                                             | ENC1                                                               |
| GO:0019005 | SCF ubiquitin ligase complex                           | 1.07150 | 10 | 0.01087 | 0.007006152 | 0.007006152 | FBXO7, FBXL15                                                                                                                                                                                                              |                                                                    |
| GO:0009897 | external side of plasma membrane                       | 1.69212 | 1  | 0.00510 | 0.007033553 | 0.007033553 | ATP1B2, CA4, RTN4R                                                                                                                                                                                                         | CTLA4, MCAM, NCAM1, TFRC, TGFBR3, THBS1, ADAM9, CD163              |
| GO:0005874 | microtubule                                            | 1.60725 | 10 | 0.00606 | 0.008586774 | 0.014338712 | FGF13, MAP3K11, TUBB2A, CDK2AP2, TUBB4A, MAP1S, FHDC1                                                                                                                                                                      | MACF1, DYNC2H1                                                     |
| GO:0072686 | mitotic spindle                                        | 1.41243 | 10 | 0.00592 | 0.010156551 | 0.012813351 | CXCR2, LIMK2, MAK, TUBB2A, TUBB4A, LSM14A, HECW2, HEPACAM2                                                                                                                                                                 | MAP9                                                               |
| GO:0001725 | stress fiber                                           | 1.25974 | 9  | 0.00541 | 0.011035138 | 0.014778958 | ACTN1, CNN2, TEK                                                                                                                                                                                                           |                                                                    |
| GO:0035976 | transcription factor AP-1 complex                      | 6.21470 | 10 | 0.04348 | 0.013324871 | 0.013324871 |                                                                                                                                                                                                                            | FOS, JUN                                                           |
| GO:0016529 | sarcoplasmic reticulum                                 | 2.82486 | 4  | 0.00576 | 0.01333921  | 0.015705578 |                                                                                                                                                                                                                            | ATP2A2, THBS1, SYNE2, CMYA5                                        |
| GO:0010008 | endosome membrane                                      | 1.05496 | 1  | 0.00606 | 0.014285424 | 0.014285424 | IRF7, NCF4, UBA52, UBB, TCIRG1, EHD1, VPS37C                                                                                                                                                                               | FLT3, MRC1, TFRC, VPS13A                                           |
| GO:0034993 | meiotic nuclear membrane microtubule tethering complex | 3.10735 | 8  | 0.00539 | 0.015980188 | 0.015980188 |                                                                                                                                                                                                                            | SYNE2                                                              |
| GO:0030424 | axon                                                   | 1.22337 | 10 | 0.00543 | 0.01860246  | 0.01860246  | FGF13, MME, SNCA, GHRL, PINK1                                                                                                                                                                                              | FMR1, KCNA2, NRP1, SACS, MAP9                                      |
| GO:0005776 | autophagosome                                          | 1.08396 | 10 | 0.01543 | 0.019274145 | 0.038770019 | ULK1, MAP1LC3A, ATG16L2                                                                                                                                                                                                    |                                                                    |
| GO:0015630 | microtubule cytoskeleton                               | 1.58770 | 9  | 0.00546 | 0.021013999 | 0.032252673 | CXCR2, TUBB2A, SPAG6, TUBB4A, CDC42EP2, MID1IP1, ENKD1, LRRC25                                                                                                                                                             | DST, CCNA1, PRC1, KLF4, NUA1, GAS2L3                               |
| GO:0005811 | lipid droplet                                          | 1.96945 | 2  | 0.00522 | 0.021778659 | 0.03039155  | ALOX15, EHD1, HSD3B7, DGAT2, PLIN5, PLIN4                                                                                                                                                                                  | VPS13A, GOS2, VPS13C                                               |
| GO:0012507 | ER to Golgi transport vesicle membrane                 | 2.07157 | 9  | 0.01075 | 0.022120423 | 0.024374476 | HLA-A, HLA-B, HLA-C, TGFA, CNIH3                                                                                                                                                                                           | AREG                                                               |
| GO:0031252 | cell leading edge                                      | 2.91314 | 2  | 0.00606 | 0.022771594 | 0.022771594 | ITGB4, SH3BP1, CADM4                                                                                                                                                                                                       | DST, LDB2, JMY                                                     |
| GO:1990752 | microtubule end                                        | 6.21470 | 4  | 0.00528 | 0.023109814 | 0.024234956 | NAV3                                                                                                                                                                                                                       | CAMSAP2                                                            |
| GO:0030122 | AP-2 adaptor complex                                   | 2.58946 | 10 | 0.00543 | 0.023946749 | 0.025352361 | SGIP1                                                                                                                                                                                                                      |                                                                    |
| GO:0070062 | extracellular exosome                                  | 1.32793 | 7  | 0.00541 | 0.024721591 | 0.027606766 | AOC1, ALDOA, ANPEP, AQP1, CA4, WNT6, WLS                                                                                                                                                                                   | FN1, CUBN, AHNAK                                                   |
| GO:0048471 | perinuclear region of cytoplasm                        | 0.94881 | 8  | 0.00543 | 0.025195538 | 0.028515932 | ACHE, CA4, CSF1, DMTN, GNB2, HSPA1B, INHBB, SNCA, TGFA, YBX3, SLC9A3R1, PRDX5, MAP1S, HHATL, PINK1, GDPD3, DGAT2                                                                                                           | CTLA4, FMR1, PIK3R1, TFRC, GALNT4, TENM1, CMYA5                    |
| GO:0031012 | extracellular matrix                                   | 1.98342 | 2  | 0.00514 | 0.025229827 | 0.025229827 | LTBP2, PI3, TGM2                                                                                                                                                                                                           | FN1, MATN1, THBS1                                                  |
| GO:0017053 | transcription repressor complex                        | 0.63415 | 1  | 0.00538 | 0.025884041 | 0.025884041 | GATA1                                                                                                                                                                                                                      | ZBTB16                                                             |
| GO:0000139 | Golgi membrane                                         | 1.43785 | 9  | 0.00546 | 0.026098301 | 0.034991485 | BSG, FUT7, HLA-A, HLA-B, HLA-C, LFN3, ST3GAL2, ST3GAL4, TNFRSF1A, ST8SIA4, B3GALT2, RAB33A, RAB36, AP1M2, ST6GALNAC2, GALNT5, ST6GALNAC4, CYTH4, PYCARD, ST6GALNAC6, CHST7, GALNT14, WLS, CREB3L3, ZDHHC19, CHST13, B3GNT8 | NCAM1, GALNT4, ARFGF2, ABCA6, RAB39A, XYLT1, B3GNT7, ZDHHC21, IRGM |
| GO:0036064 | ciliary basal body                                     | 1.34453 | 4  | 0.00528 | 0.02894533  | 0.0318006   | B9D2, ENKD1, CEP19                                                                                                                                                                                                         | CAMSAP2, RTTN, AHI1, CCDC88A, ODF2L, TTBK2                         |
| GO:0019897 | extrinsic component of plasma membrane                 | 3.88419 | 9  | 0.00546 | 0.02924932  | 0.047932135 |                                                                                                                                                                                                                            | FMR1, EEA1, SYTL2                                                  |
| GO:0005577 | fibrinogen complex                                     | 3.88419 | 10 | 0.00592 | 0.032645283 | 0.034890449 |                                                                                                                                                                                                                            | FN1, THBS1                                                         |
| GO:0030056 | hemidesmosome                                          | 5.17892 | 10 | 0.00543 | 0.032978663 | 0.034623471 | ITGB4                                                                                                                                                                                                                      | DST                                                                |
| GO:1904724 | tertiary granule lumen                                 | 3.95481 | 9  | 0.00546 | 0.036658566 | 0.036658566 | ALDOA, CDA, CNN2, FOLR3, CXCL1, HBB, MMP9, ORM1, TNFAIP6, PGLYRP1, QPCT, LRG1, CANT1                                                                                                                                       | PTX3                                                               |
| GO:0022625 | cytosolic large ribosomal subunit                      | 0.95123 | 10 | 0.00562 | 0.037916244 | 0.045102026 | UBA52                                                                                                                                                                                                                      | RPL17, RPL36A                                                      |
| GO:0014731 | spectrin-associated cytoskeleton                       | 8.87815 | 10 | 0.00543 | 0.039554183 | 0.04168604  | ANK1, DMTN, SPTA1, SPTB                                                                                                                                                                                                    |                                                                    |
| GO:0097386 | glial cell projection                                  | 3.88419 | 10 | 0.00543 | 0.042071087 | 0.042071087 | ABCA7                                                                                                                                                                                                                      | FMR1                                                               |
| GO:0055037 | recycling endosome                                     | 0.79676 | 1  | 0.00510 | 0.043976172 | 0.043976172 | ULK1, RAB11B                                                                                                                                                                                                               | TFRC, ARFGF2                                                       |
| GO:0030426 | growth cone                                            | 2.21954 | 2  | 0.00606 | 0.047109871 | 0.047109871 | DBN1, FGF13, SNCA, STX3                                                                                                                                                                                                    | FMR1, AUTS2, ZNF804A, SLC2A13                                      |
